# Supplementary material for: Immune mechanisms of granuloma formation in sarcoidosis and tuberculosis
Source: JCI journal article supplement (doi:10.1172/jci175264), 2024-01-01
Supplement: sd1 [file 1]

| Category                           | Gene polymorphism                                                                       | Population                                            | Association                                                                          |
|------------------------------------|-----------------------------------------------------------------------------------------|-------------------------------------------------------|--------------------------------------------------------------------------------------|
| HLA gene locus                     | HLA-DRB1 (*1101) and HLA-DPB1 (*0101) alleles                                           | USA                                                   | Increased risk of sarcoidosis(8)                                                     |
|                                    | HLA-DRB1 * 14, DRB1 * 15, and DQB1*0601                                                 | Japan, UK, Netherlands, Finnish                       | Chronic sarcoidosis <sup>(9, 10)</sup>                                               |
|                                    | HLA-DRB1*03 and DQB1*0201 alleles                                                       | Sweden                                                | Increased risk of Lofgren (11) syndrome                                              |
|                                    | HLA-B * 51                                                                              | Han Chinese                                           | Increased risk of Lofgren (12) syndrome                                              |
|                                    | DRB1*0301                                                                               | African American                                      | Decreased risk of extra-pulmonary manifestations (13)                                |
|                                    | DRB1*04 and DRB1*0302                                                                   | Sweden                                                | Increased risk of extra pulmonary and skin manifestations (14)                       |
|                                    | HLA-DRB1 * 04                                                                           | UK, Japan, European and African American cohorts      | Sarcoidosis uveitis (9, 15)                                                          |
|                                    | HLA-DQB1*0601                                                                           | Japan                                                 | Cardiac sarcoidosis (16)                                                             |
|                                    | HLA-DPA1/HLA-DPB1 HLA-DRB1                                                              | USA (New York fire department, 9/11 first responders) | Increased risk of sarcoidosis (17)                                                   |
|                                    | HLA DRB1*14                                                                             | Turkish                                               | Increased risk of left ventricular diastolic dysfunction in cardiac sarcoidosis (18) |
| T cell activation regulatory genes | BTNL-2 rs2076530 – truncating splice site mutation<br>BTNL2 promoter region (rs5007259) | Germany                                               | T cell dysregulation, increased risk of sarcoidosis (19-21)                          |

|                                              |                                                                                        |                                                        |                                                                                                               |
|----------------------------------------------|----------------------------------------------------------------------------------------|--------------------------------------------------------|---------------------------------------------------------------------------------------------------------------|
| Pattern recognition receptor encoding genes  | TLR 4 polymorphisms for the TLR4 gene (Asp299Gly and Thr399Ile)                        | Germany                                                | Increased risk of chronic sarcoidosis (22)                                                                    |
|                                              | TLR-9 C-allele for T1237C                                                              | Germany                                                | Increased risk of chronic sarcoidosis (22)                                                                    |
|                                              | TLR-2 AA-genotype at promotor location -16934                                          | Netherlands                                            | Increased in patients with chronic disease compared to patients with acute/self-remitting sarcoidosis (23)    |
|                                              | TLR -3 TLR3 polymorphism Leu412Phe (rs3775291)                                         | Irish and American Caucasian                           | Significant association with persistent clinical disease in pulmonary sarcoidosis <sup>(24)</sup>             |
|                                              | TLR10-TLR1-TLR6<br>Absence of the common haplotype in the TLR10-TLR1-TLR6 gene cluster | Netherlands                                            | Increases the risk of developing chronic disease in patients already affected by sarcoidosis (25)             |
|                                              | NOD2                                                                                   | France, UK                                             | Sarcoid-related uveitis, and orofacial granulomatosis, including those associated with Blau syndrome (26, 27) |
| Cytokines, chemokines and cytokine receptors | TNF- $\alpha$ TNF- $\alpha$ -308 A/G and LT- $\alpha$ +252 A/G polymorphisms           | Europe                                                 | Increased risk of sarcoidosis -308 A > G, was shown to decrease the response to TNF inhibitors (28, 29)       |
|                                              | LTA Variant in LTA intron 1                                                            | Caucasian females (ACCESS study)                       | Associated with erythema nodosum in female Caucasian sarcoidosis patients (30)                                |
|                                              | IL - 23R rs11465804 and rs11209026                                                     | Mixed ethnicity (Asian, Caucasian, African - American) | Sarcoidosis uveitis (31)                                                                                      |
|                                              | IL12B                                                                                  | Germany                                                | Central nervous system sarcoidosis<br>Increased risk of sarcoidosis (21)                                      |
| CCR5                                         | Czech Republic                                                                         | Progression of pulmonary sarcoidosis (32)              |                                                                                                               |

|                                     |                                                                                |                               |                                                                                                                                     |
|-------------------------------------|--------------------------------------------------------------------------------|-------------------------------|-------------------------------------------------------------------------------------------------------------------------------------|
|                                     | CCL24                                                                          | Japan                         | Increased risk of sarcoidosis (33)                                                                                                  |
| Cytoskeletal protein encoding genes | RAB23 gene on chromosome 6p21 - non-synonymous SNP variant, rs10484410 (G207S) | Germany                       | Sarcoidosis uveitis (34)                                                                                                            |
|                                     | MAGI1                                                                          | African American              | Sarcoidosis uveitis (15)                                                                                                            |
| Autophagy                           | XAF-1 intronic variant (rs6502976)                                             | African American              | Increased risk of sarcoidosis (35)                                                                                                  |
|                                     | mTORC1                                                                         | France                        | Familial sarcoidosis (36)                                                                                                           |
| TGF beta genes                      | TGFB3 4875 A<br>TGFB3 17369 C<br>TGFB2 59941 G                                 | Netherlands                   | Over-represented in chronic fibrotic patients compared to those with acute/self-remitting and non-fibrotic chronic sarcoidosis (37) |
|                                     | TGFB2 rs1891467                                                                | Germany                       | Protected from developing a chronic course (38)                                                                                     |
|                                     | rs3917200                                                                      | Germany                       | Fibrotic pulmonary sarcoidosis (38)                                                                                                 |
|                                     | TGF-β3 rs3917200*G                                                             | Greek                         | Associated with sarcoidosis (39)                                                                                                    |
| ANXA11                              | ANXA11 Pathogenic SNP, rs1049550                                               | German                        | Increased risk of sarcoidosis (40)                                                                                                  |
|                                     | 209 SNPs in the ANXA11 rs61860052 rs4377299                                    | African American              | Associated with the risk of disease susceptibility and radiographic stage (41)                                                      |
|                                     | ANXA11 rs1049550*A                                                             | Greek                         | Protective for sarcoidosis (39)                                                                                                     |
|                                     | non-coding SNP (rs61860052) of Annexin A11                                     | African American              | increased risk of sarcoidosis-associated uveitis and pulmonary fibrosis (42)                                                        |
| Other                               | NOTCH4 polymorphism in NOTCH4 (rs715299)                                       | African American and European | Increased risk of sarcoidosis (36)                                                                                                  |
|                                     | TAP2                                                                           | UK, Polish Slavonic           | Increased risk of sarcoidosis (43)                                                                                                  |

|                        |                                                       |                                     |
|------------------------|-------------------------------------------------------|-------------------------------------|
| NF – κB                | European                                              | Increased risk of sarcoidosis (21)  |
| ZNF592                 | African American, European                            | Neurosarcoidosis (44)               |
| AADCL3                 | Finland                                               | Resolving disease (45)              |
| STYXL1-SRRM3           | Japan                                                 | Increased risk of sarcoidosis (33)  |
| PTGS2/COX2             | USA (New York fire department, 9/11 first responders) | Increased risk of sarcoidosis (17)  |
| DBP rs4588 AA genotype | Serbia                                                | Increased risk of sarcoidosis (46)  |
| GREM1 rs1919364        | Netherlands                                           | Fibrotic pulmonary sarcoidosis (47) |

Table 1 Genetic association studies showing genes and loci associated with susceptibility and severity of sarcoidosis
